# Supplementary material
Source: PubMed Central journal article supplement (PMC3988227)
Supplement: NIHMS540454-supplement-401_2013_1212_MOESM1_ESM.pdf [file NIHMS540454-supplement-401_2013_1212_MOESM1_ESM.pdf]

Author Affiliations:

1Department of Pediatrics, University of Colorado Denver, 12800 East 19th Avenue, Aurora, CO 80045

2Department of Pulmonary and Critical Care Medicine, University of Colorado Denver, 12800 East 19th Avenue, Aurora, CO 80045

3Department of Radiation Oncology, University of Colorado Denver, 12800 East 19th Avenue, Aurora, CO 80045

4Department of Neurosurgery, University of Colorado Denver, 12800 East 19th Avenue, Aurora, CO 80045

Email of Corresponding Author: lindsey.hoffman@childrenscolorado.org

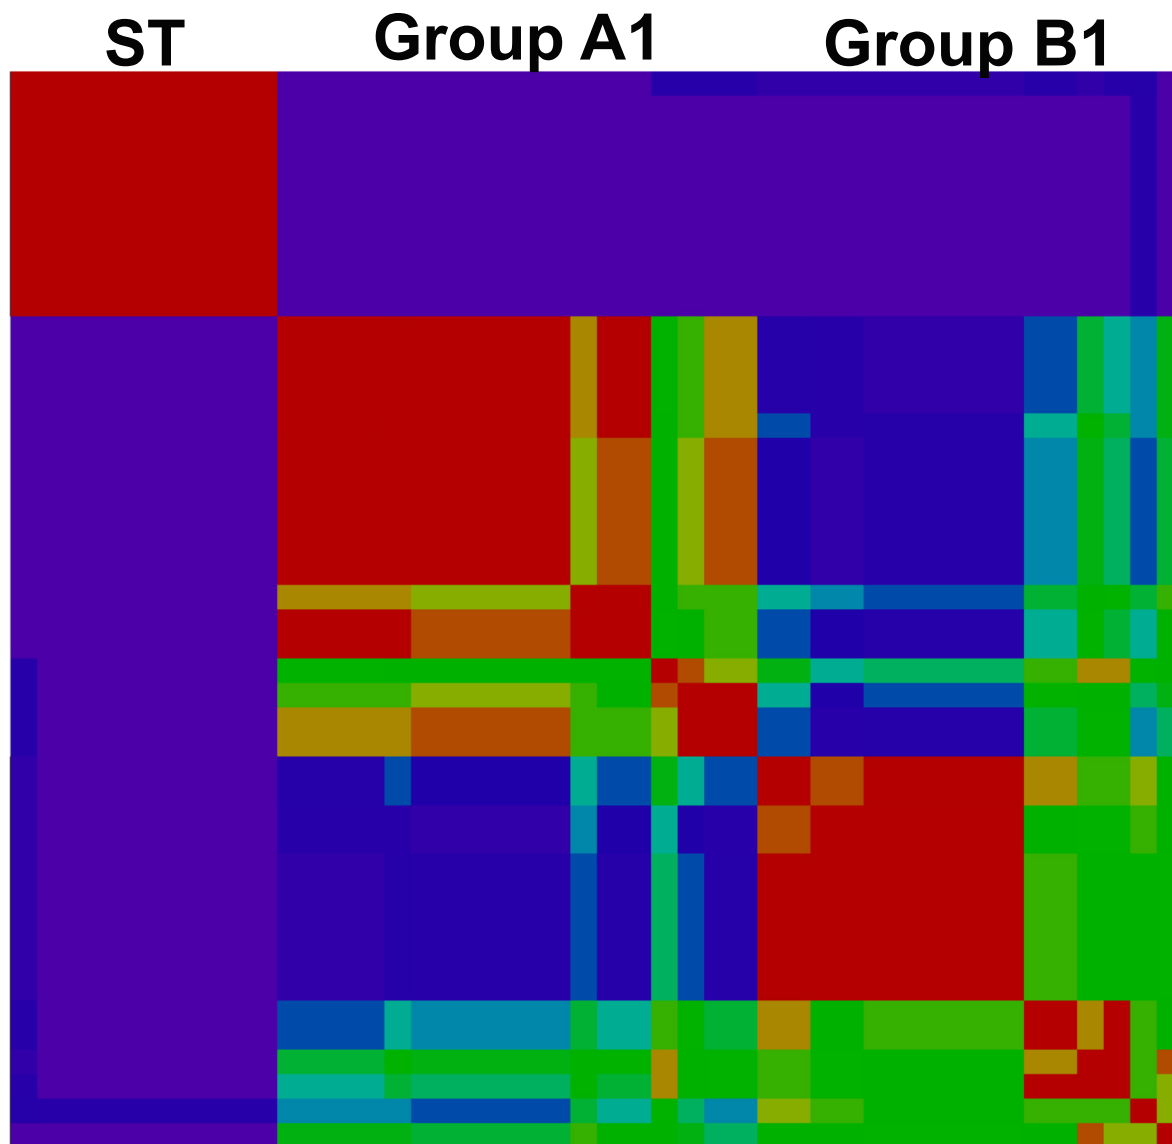

Online Resource 1. Non-negative matrix factorization (NMF) of 44 primary ependymoma samples reveal 3 sub-groups, including 1 supratentorial and 2 posterior fossa sub-groups (Groups A and B)
